# Supplementary material
Source: publisher site journal article supplement (https://www.dovepress.com/article/562838)
Supplement: Supplementary file 1 [file 562838_Supplementary%20materials.docx]

**Supplementary materials**

**S1 Biological Function and Pathway Analyses of LCAT in HCC**

To further explore the role of LCAT in HCC, we further conducted a GSEA analysis based on the TCGA database. The GO enrichment analysis indicated that LCAT was correlated with chemical carcinogenesis, drug metabolism-cytochrome P450, fatty acid degradation, glycine, serine, and threonine metabolism et.al. (Figure S1A). Further KEGG analysis demonstrated that LCAT level was mainly correlated with alpha-amino acid catabolic process, amino acid catabolic process, fatty acid beta-oxidation, fatty acid catabolic process, lipid oxidation, and monocarboxylic acid catabolic process (Figure S1B). The above results suggest that LCAT may be related to fatty acid metabolism. Therefore, we analyzed using the TCGA database the correlation between LCAT and fatty acid metabolism-related metabolic genes. Surprisingly, we found that in HCC tissues, LCAT showed significant positive correlations with markers related to fatty acid oxidation, synthesis, breakdown, and transport (Figure S1C).


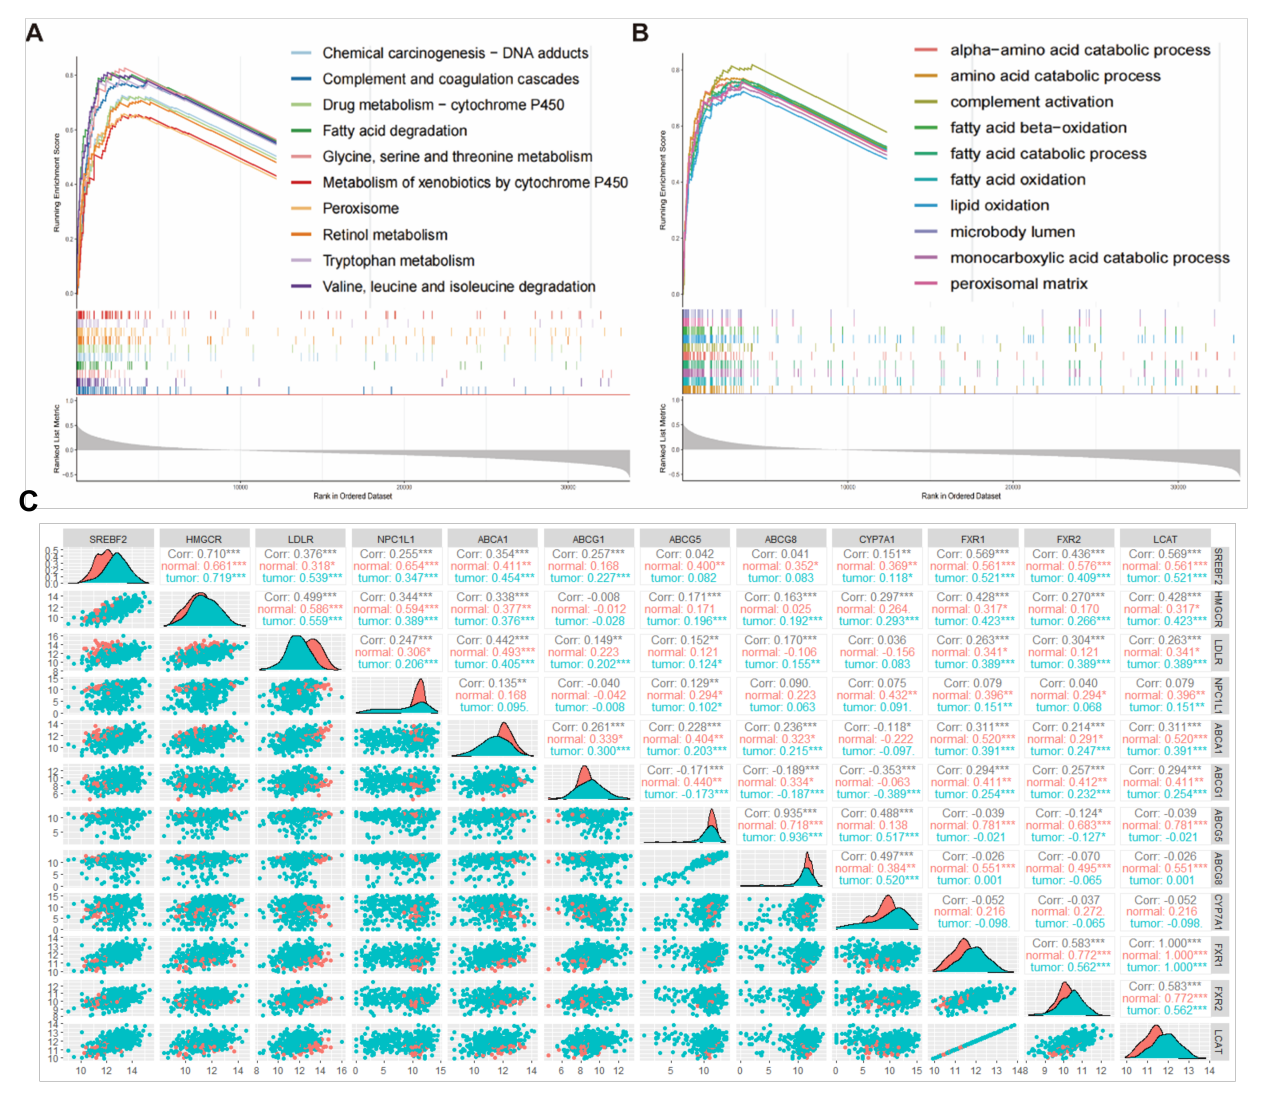


**Figure S1. Biological function analyses of LCAT expression in HCC. (A)** Go analyses of LCAT-related gene expression. **(B)** KEGG analyses of LCAT-related gene expression. **(C)**Correlation analysis between fatty acid metabolism markers.

**S2 LCAT was associated with an immunosuppressive TME in HCC**

To further explore the mechanism of LCAT affecting patients’ prognosis, the correlation between LCAT expression and immune infiltration in pan-cancer was investigated. According to the Tumor Immune Estimation Resource (TIMER) database, LCAT was significantly negatively correlated with six main infiltrating immune cells in HCC, such as B cells, CD8+T cells, CD4+T cells, macrophages, dendritic cells, and neutrophils (Figure S2A). This would suggest that it is the down-regulation of LCAT that triggers an immune response. Next, we also explored the immune landscape using different algorithms and found LCAT expression showed a negative correlation with immunosuppressive cells including regulatory T cells (Tregs), M2 macrophages, and myeloid-derived suppressor cells (MDSCs) but show a positive correlation with cancer-associated fibroblasts (CAFs) (Figure S2B). Next, we explored how LCAT affected immune cells infiltration. The correlation between LCAT expression and immune checkpoint gene expression was investigated. We found that LCAT expression was significantly associated with more than 10 immune checkpoints markers such as IL12A, VTCN1, BTLA, and TIGIT (Figure S2C).

**
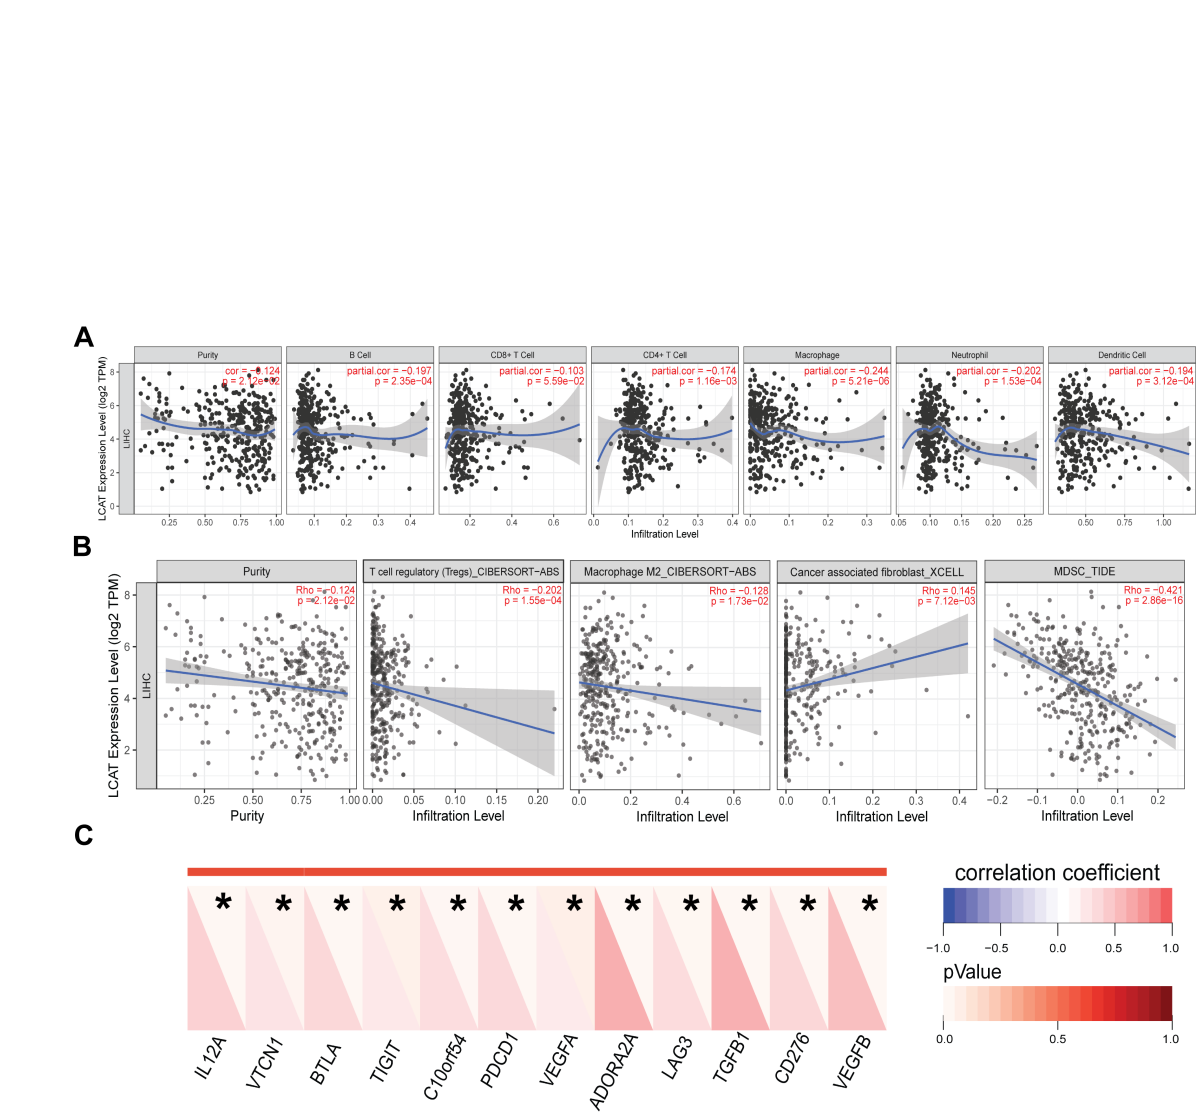
**

**Figure S2. Biological Function and Pathway Analyses of LCAT in HCC.** **(A)** Correlation between LCAT with six main infiltrating cells in HCC via TIMER. **(B)** Correlation between LCAT with four immunosuppressive cells in HCC via TIMER2. **(C)** Correlation analyses between LCAT expression, and inhibitory immune checkpoints in HCC. * p < 0.05.

**
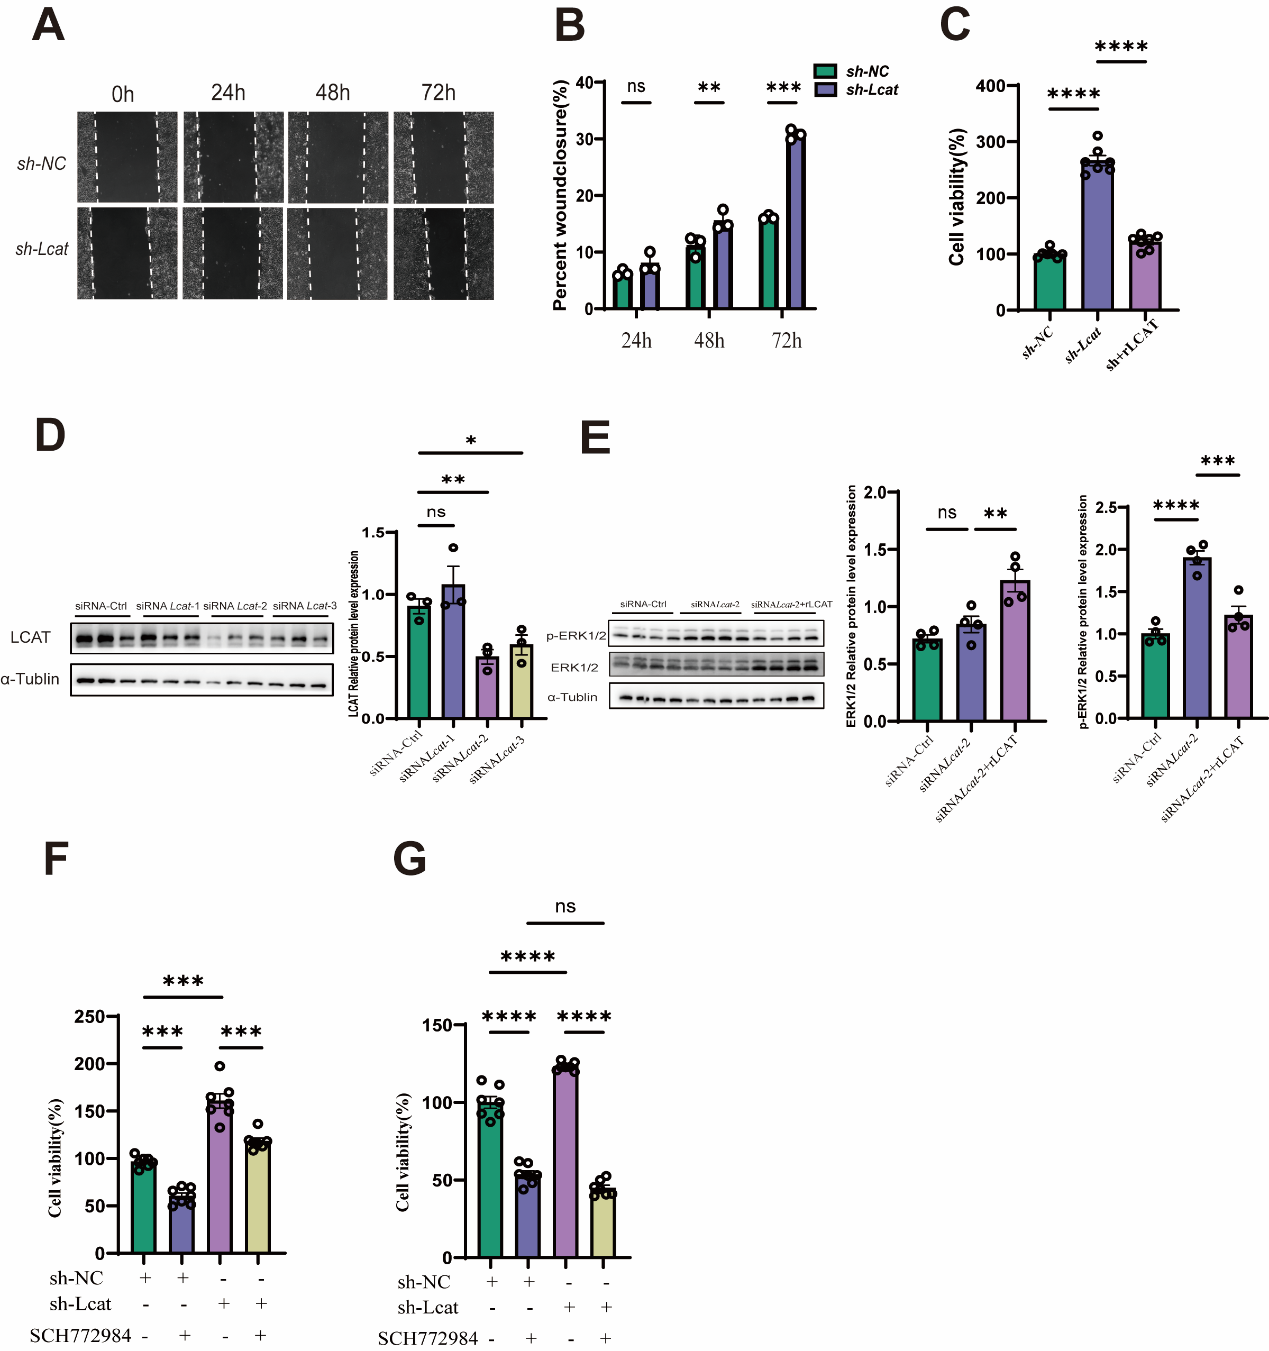
**

**Figure S3. LCAT exerts a potent inhibitory effect on the progression of hepatocellular carcinoma through the suppression of ERK1/2 phosphorylation** **(A&B)** Correlation Representative images (0 h, 24 h, 48 h, 72 h) and quantitative analysis of wound healing assay after LCAT knockdown in HCC cell line 97L. **(C)** 97L cell proliferation was examined by CCK8 assay. **(D)** West blot validation quantitative analysis was used to verify the correlation of si-RNA-Lcat knockdown in the Huh7 cell line. **(E)** Western blot and its quantitative analysis were used to evaluate the rescue experiment with recombinant LCAT protein - rLCAT. **(F)** CCK-8 assay was performed to assess whether pharmacological inhibition of ERK reverses the enhanced proliferation of Huh7 cells at 24 hours post *sh-LCAT*-mediated LCAT knockdown. **(G)** CCK-8 assay was performed to assess whether pharmacological inhibition of ERK reverses the enhanced proliferation of Huh7 cells at 48 hours post *sh-LCAT*-mediated LCAT knockdown.**P* < 0.05, ***P* < 0.01, ****P* < 0.001.*****P* < 0.0001.
